# Supplementary material for: Asparagus Fructans as Emerging Prebiotics
Source: MDPI journal article supplement (doi:10.3390/foods12010081), 2022-12-23
Supplement: s1 [file s1]

Supplementary Material

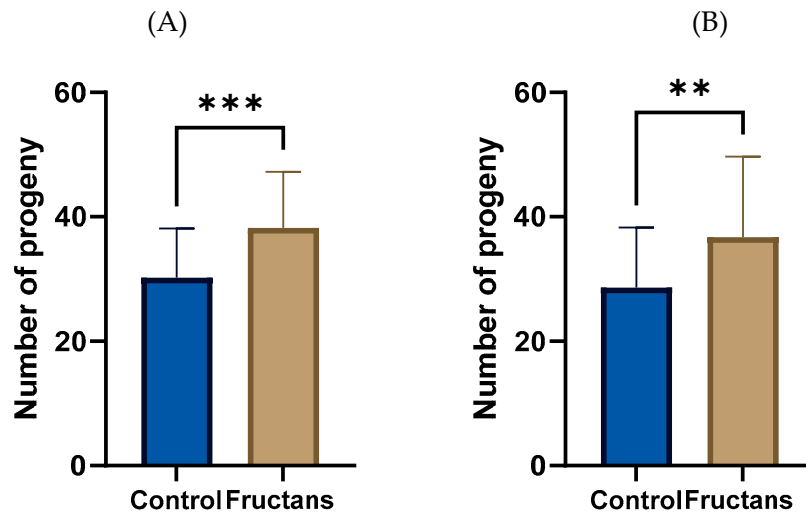

**Figure S1.** Asparagus fructans extracts enhances fertility of the mutant *daf-2(e-1370)* ( $168\mu\text{g/mL}$ ). The total number of progeny produced increased significantly following asparagus fructans extracts treatment. **(A)**: the second independent experiment and **(B)**: the third independent experiment. Graphs represent mean  $\pm$  SD  $n = 30$ . \*\*  $p \leq 0.01$ , \*\*\*  $p \leq 0.001$  using Two-tailed  $t$ -test.
